# Supplementary material
Source: PubMed Central journal article supplement (PMC3033660)
Supplement: NIHMS243995-supplement.pdf [file NIHMS243995-supplement.pdf]

## Supporting Information for:

### Synthesis and Anticancer Properties of Water-Soluble Zinc Ionophores

**Authors:** Darren Magda,<sup>1</sup> Philip Lecane,<sup>1</sup> Zhong Wang,<sup>1</sup> Weilin Hu,<sup>1</sup> Patricia Thiemann,<sup>1</sup> Xuan Ma,<sup>1</sup> Patricia K. Dranchak,<sup>2</sup> Xiaoming Wang,<sup>2</sup> Vincent Lynch,<sup>3</sup> Wenhao Wei,<sup>3</sup> Viktor Csokai,<sup>3</sup> Joseph G. Hacia,<sup>2</sup> and Jonathan L. Sessler<sup>3</sup>

**Author affiliations:** <sup>1</sup>Pharmacyclics, Inc., Sunnyvale, CA 94085, <sup>2</sup>Department of Biochemistry and Molecular Biology, University of Southern California, Los Angeles, CA 90089, <sup>3</sup>Department of Chemistry and Biochemistry, Institute for Cellular and Molecular Biology, 1 University Station-A5300, The University of Texas at Austin, Austin, Texas. 78712-0165

**Requests for reprints:** Darren Magda, Pharmacyclics, Inc., 995 E. Arques Avenue, Sunnyvale, CA 94085. Phone: 408-774-3318; Fax: 408-328-3689; E-mail: [dmagda@pcyc.com](mailto:dmagda@pcyc.com)

## Materials and Methods

**Materials.** Motexafin gadolinium (MGd) was used as a 2 mM (2.3 mg/mL) formulation in 5% aqueous mannitol. Zinc acetate (99.99%, ZnOAc<sub>2</sub>) was purchased from Aldrich Chemical Co. and prepared as a 2 mM formulation in 5% aqueous mannitol. PCI-5002 and PCI-5003, synthesized as described below, were formulated in 5% mannitol at 2 to 8 mM concentrations for both in vitro and in vivo experiments. PCI-5001 and the zinc salt of 1-hydroxypyridine-2-thione (ZnHPT, Sigma Chemical) were formulated in DMSO for in vitro experiments. The zinc-free ligands were freely soluble in aqueous media. The lowest energy extinction coefficient of ZnHPT ( $\epsilon_{280} = 22,082 \text{ M}^{-1} \text{ cm}^{-1}$ ;  $\epsilon_{332} = 6,187 \text{ M}^{-1} \text{ cm}^{-1}$ ; DMSO) was used to quantify solutions of ZnHPT analogues, which were in some cases isolated as oils. The extinction coefficients of PCI-5001 ( $\epsilon_{284} = 24,416 \text{ M}^{-1} \text{ cm}^{-1}$ ;  $\epsilon_{336} = 6,228 \text{ M}^{-1} \text{ cm}^{-1}$ ; DMSO) were nearly identical to those of ZnHPT. ACS grade water, purchased from Aldrich Chemical Co., was used to prepare (10X) secondary stocks of MGd and zinc.

**Cells and Cell Culture Reagents.** A549 lung cancer and PC3 prostate cancer lines were obtained from the American Type Culture Collection. Unless otherwise indicated, all cell

culture reagents were purchased from Invitrogen. Cells were cultured in RPMI 1640 medium supplemented with 20 mM HEPES, 2 mM L-glutamine, 10% heat inactivated fetal bovine serum (Hyclone) and antibiotics (200 U/mL penicillin and 200 µg/mL streptomycin).

**Cellular Proliferation.** The proliferation of exponential phase cultures of A549 and PC3 cells was assessed by tetrazolium salt reduction (1). In brief, A549 (2000 cells/well) or PC3 (4000 cells/well) cells were seeded on 96-well microtiter plates and allowed to adhere overnight. Stock solutions of ZnHPT or analogues in medium were serially diluted in a ratio of 1:4. Stock solutions of MGd or ZnOAc<sub>2</sub> or 5% mannitol in ACS grade water were added and plates were incubated at 37 °C under a 5% CO<sub>2</sub>/95% air atmosphere. After 72 hours, medium was replaced with fresh medium (150 µL/well) supplemented with the tetrazolium dye, 3-(4,5-dimethylthiazol-2-yl)-2,5-diphenyltetrazolium bromide (MTT, Sigma Chemical, 0.5 mg/mL). Plates were incubated at 37 °C and viable cells measured as described (1). Cellular reduction within plateau phase cultures was measured as above after 24 hours of treatment.

**Lipoate Reduction.** Thioredoxin reductase activity was assessed by measuring the rate of lipoate reduction (2). In brief, A549 or PC3 cells (10,000 cells/well) were seeded on 96-well plates and allowed to adhere overnight and grow two additional days until confluent. Cells were treated with ZnHPT, ZnHPT analogues, zinc, or 5% mannitol as described above for 2 or 4 hours. Medium was removed, cells were washed with Hanks balanced salt solution (HBSS), and a solution of 5 mM lipoic acid and 1 mM 5,5'-dithiobis(2-nitrobenzoic acid) in HBSS (100 µL/well) was added. Plates were incubated at ambient temperature in the dark. At chosen time intervals, plate absorbances were measured at 405-650 nm. Rates were normalized to those of wells containing neither exogenous zinc nor ZnHPT analogues to allow plate-to-plate comparison.

**Intracellular Free Zinc and Cell Viability.** The concentration of intracellular free zinc was assessed using the ion-specific fluorescent probe, FluoZin-3-AM<sup>TM</sup> (FluoZin-3, Molecular Probes, Inc.) (3). Plateau phase cultures were treated with control 5% mannitol vehicle or ZnOAc<sub>2</sub> in the presence or absence of ZnHPT or ZnHPT analogues for 4 hours. Following treatment, cells were isolated by centrifugation. Cell pellets were washed and re-suspended in a solution of 0.5% BSA in PBS. An aliquot of 10<sup>6</sup> cells (200 µL) was removed, centrifuged, and treated with FluoZin-3 reaction buffer as described (3). An aliquot of the cell suspension was supplemented with 2 µg/mL propidium iodide (Sigma Biochemical), incubated for 5 minutes,

and subjected to two-parameter flow cytometric analysis as described previously (4). Cell viability and apoptosis in like-treated plateau phase cultures was measured using the ANNEXIN-V PI Kit (BD Biosciences, San Jose, CA) after 24 hours of treatment as described (5).

**Measurement of reactive oxygen species (ROS).** Reactive oxygen species were measured in live cells as intracellular peroxides by monitoring the oxidation of 2',7'-dichlorofluorescein-diacetate (DCFDA) to 2',7'-dichlorofluorescein (DCF) (Molecular Probes). Cells ( $1 \times 10^6$  per mL) were incubated in a solution of 1  $\mu$ g per mL DCFDA in 0.5% BSA in HBSS for 15 minutes at 37 °C. Two mL additional 0.5% BSA in HBSS was added, cells were isolated by centrifugation, and the pellet re-suspended in a solution of 50  $\mu$ g/mL 7-aminoactinomycin D (7-AAD) in 0.5% BSA in HBSS. Cell suspensions were incubated at ambient temperature for 2 to 3 minutes, and stored on ice until analysis. The fluorescent intensity in live (i.e., 7-AAD impermeable) cells was analyzed by flow cytometry.

**Mouse Xenograft Models.** Animal care was in accordance with NIH and institutional guidelines. For the A549 xenograft model,  $1.25 \times 10^6$  A549 cells were injected subcutaneously/intramuscularly into the right hind flank of 6 week old CD-1 nude mice that had been irradiated with 4 Gy of total body irradiation from a  $^{137}\text{Cs}$  radiation source one day prior to tumor implantation (6). For the PC3 xenograft model,  $1.5 \times 10^6$  cells were used. When the average size of tumors reached approximately  $100 \text{ mm}^3$ , mice were randomized by tumor size to treatment groups, typically containing 6-8 mice per group. Mice were treated intravenously with 2-4 doses of zinc ionophore, typically 100  $\mu$ mol/kg, on consecutive days. Vehicle control treated animals received 5% mannitol on the same schedule. Tumor and body weight measurements were performed three times per week. Tumor volume was calculated using the equation  $V (\text{mm}^3) = a \times b^2/2$ , where a is the largest diameter and b is the smallest diameter. No significant body weight loss was observed. To perform gene expression profiling, mice were treated intravenously with one dose (100  $\mu$ mol/kg) PCI-5002, PCI-5003, or control vehicle (4 mice per group) when the average A549 tumor size reached  $500 \text{ mm}^3$ . After four hours, tumors were harvested and snap frozen immediately on dry ice. Tumor tissue was dissected, homogenized in Trizol (Invitrogen, Omni International, Model TH-115), and total RNA was isolated and subjected to analysis using Human Genome U133 Plus 2.0 Arrays as described above.

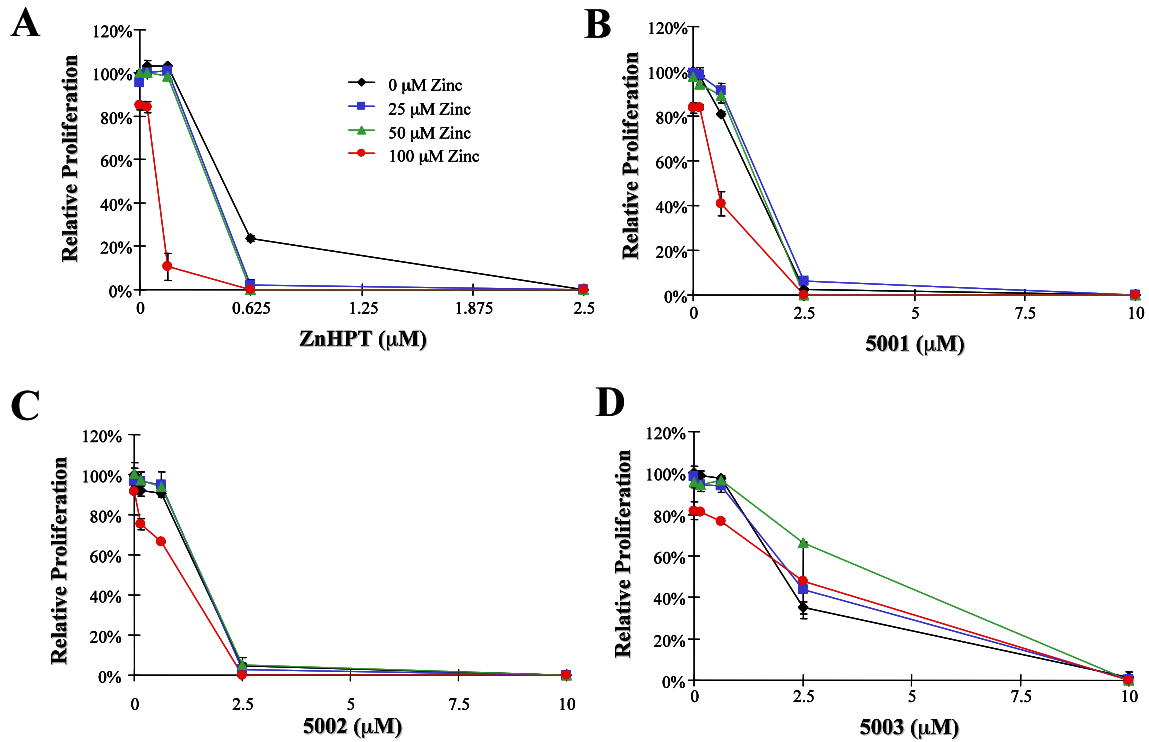

**Supplemental Figure 1. Zinc ionophores inhibit proliferation of PC3 cells.** Exponential phase cultures of PC3 cells were treated with zinc ionophores (A to D) at the indicated concentrations in the presence or absence of zinc acetate [0  $\mu\text{M}$  (black line), 25  $\mu\text{M}$  (blue line), 50  $\mu\text{M}$  (green line), and 100  $\mu\text{M}$  (red line)] for 72 hours in duplicate experiments. Error bars indicate one standard deviation.

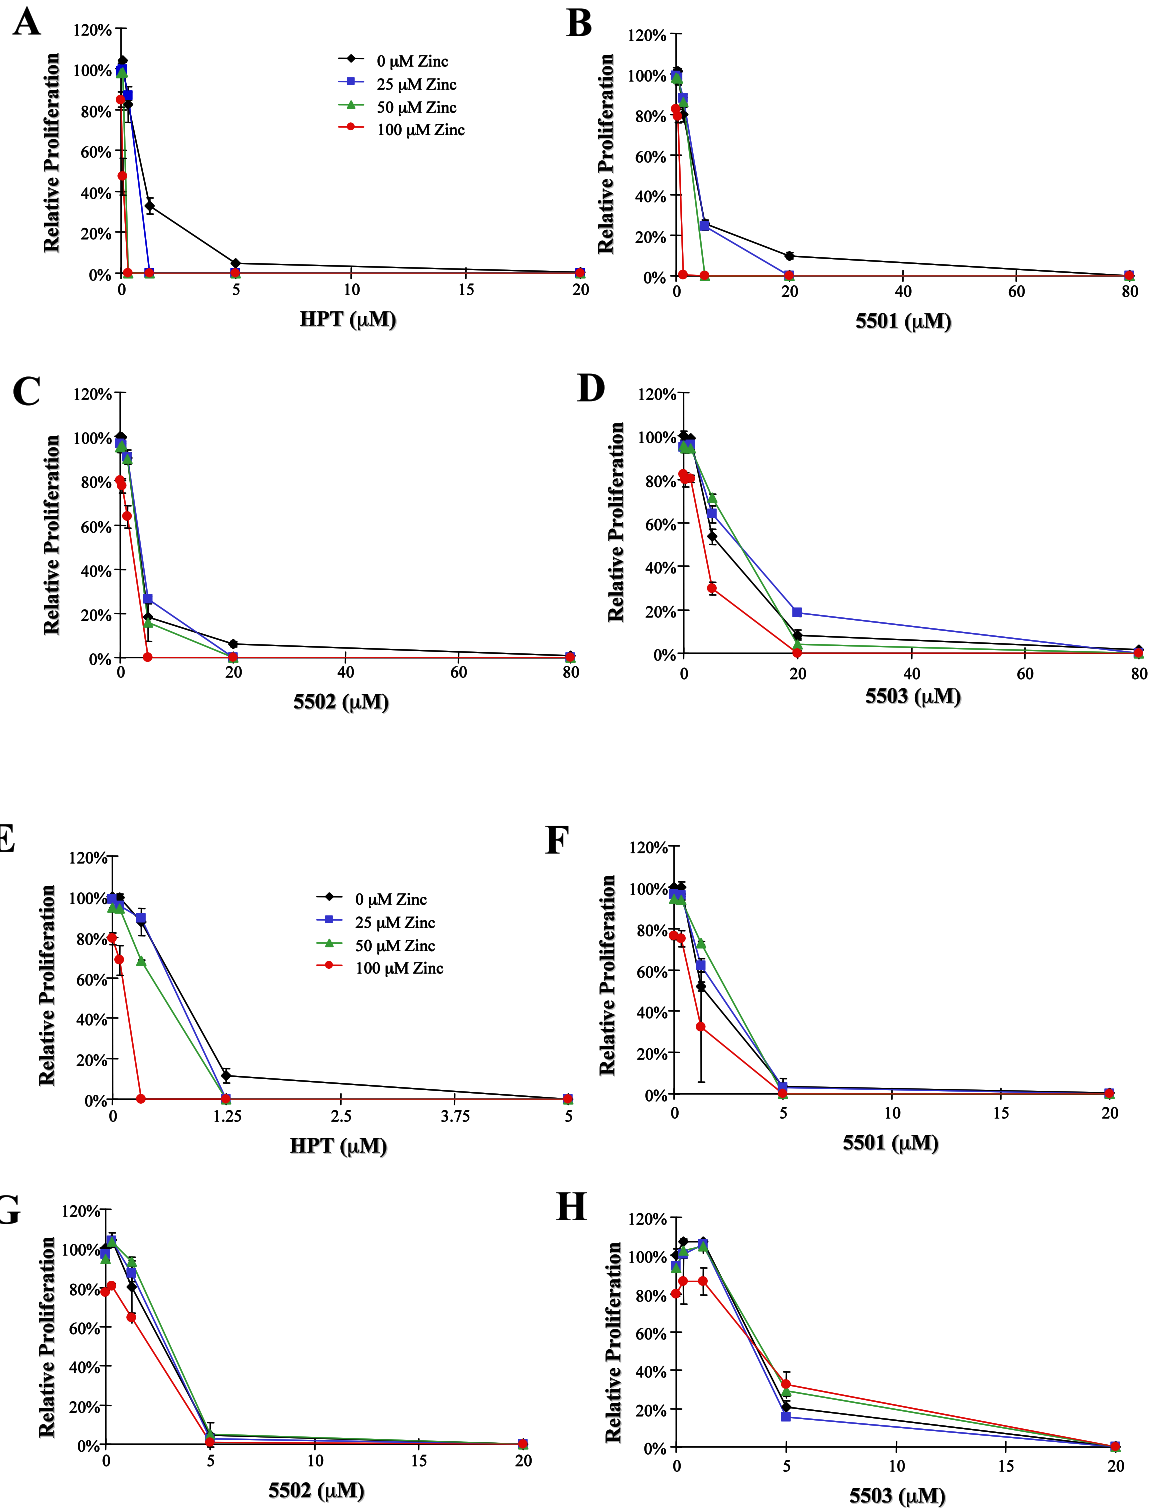

**Supplemental Figure 2. Treatment with zinc ligands inhibits A549 and PC3 cell proliferation.** Exponential phase A549 cultures (A to D) or PC3 cultures (E to H) were treated with zinc ligands at the indicated concentrations in the presence or absence of zinc acetate [0 μM

(black line), 25  $\mu\text{M}$  (blue line), 50  $\mu\text{M}$  (green line), and 100  $\mu\text{M}$  (red line)] for 72 hours in duplicate experiments. Error bars indicate one standard deviation.

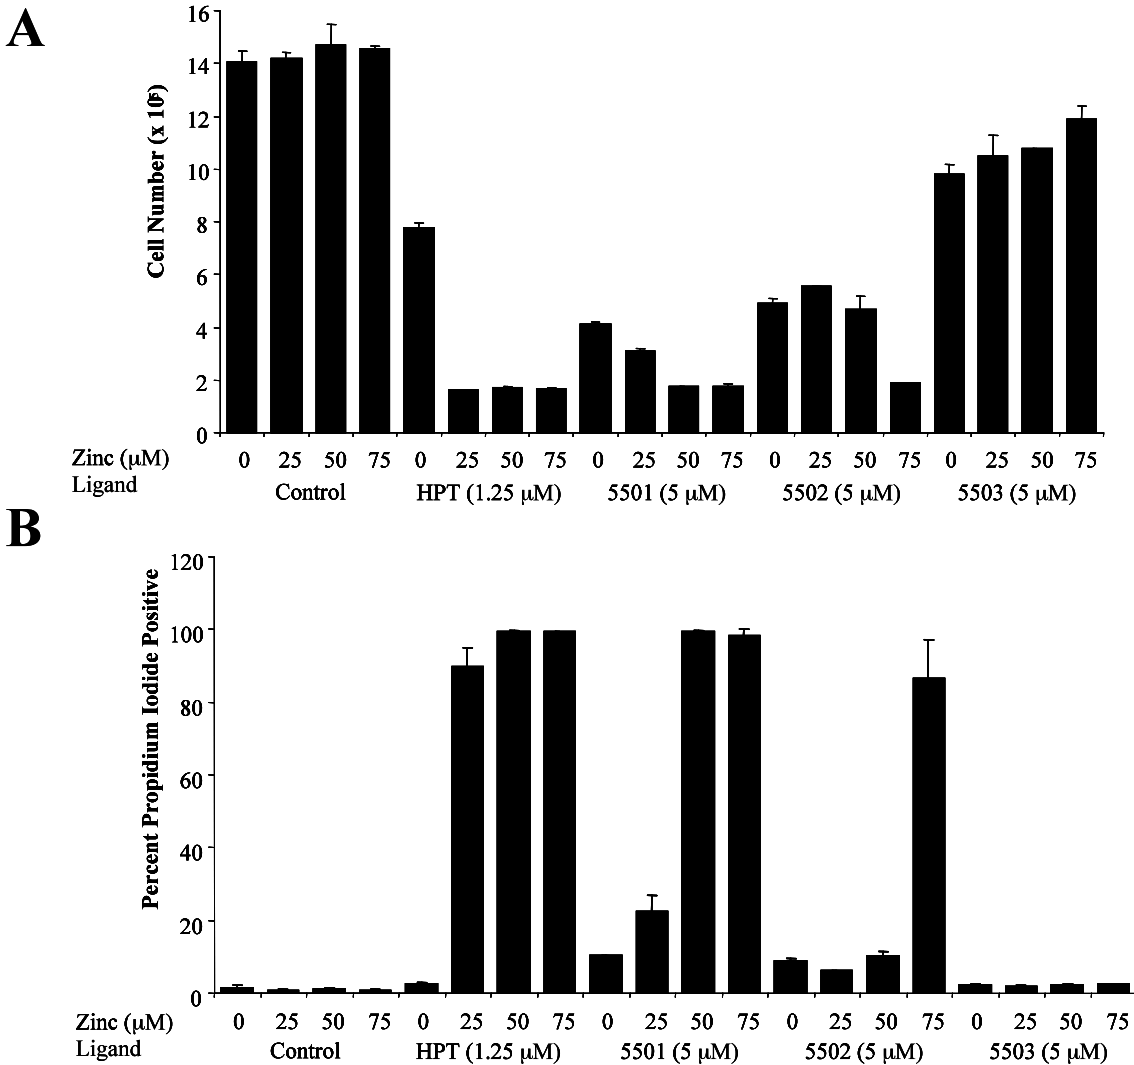

**Supplemental Figure 3. Treatment with zinc ligands inhibits A549 cell proliferation and causes cell death in response to zinc.** Exponential phase A549 cultures were treated with zinc ligands (1.25 or 5  $\mu\text{M}$ ) in the presence or absence of zinc acetate (Zinc, 0-75  $\mu\text{M}$ ) for 72 hours in duplicate experiments. Error bars indicate one standard deviation. A. Cell density by Coulter counting after 72 hours of treatment. B. Percentage of propidium iodide stained cells after 72 hours.

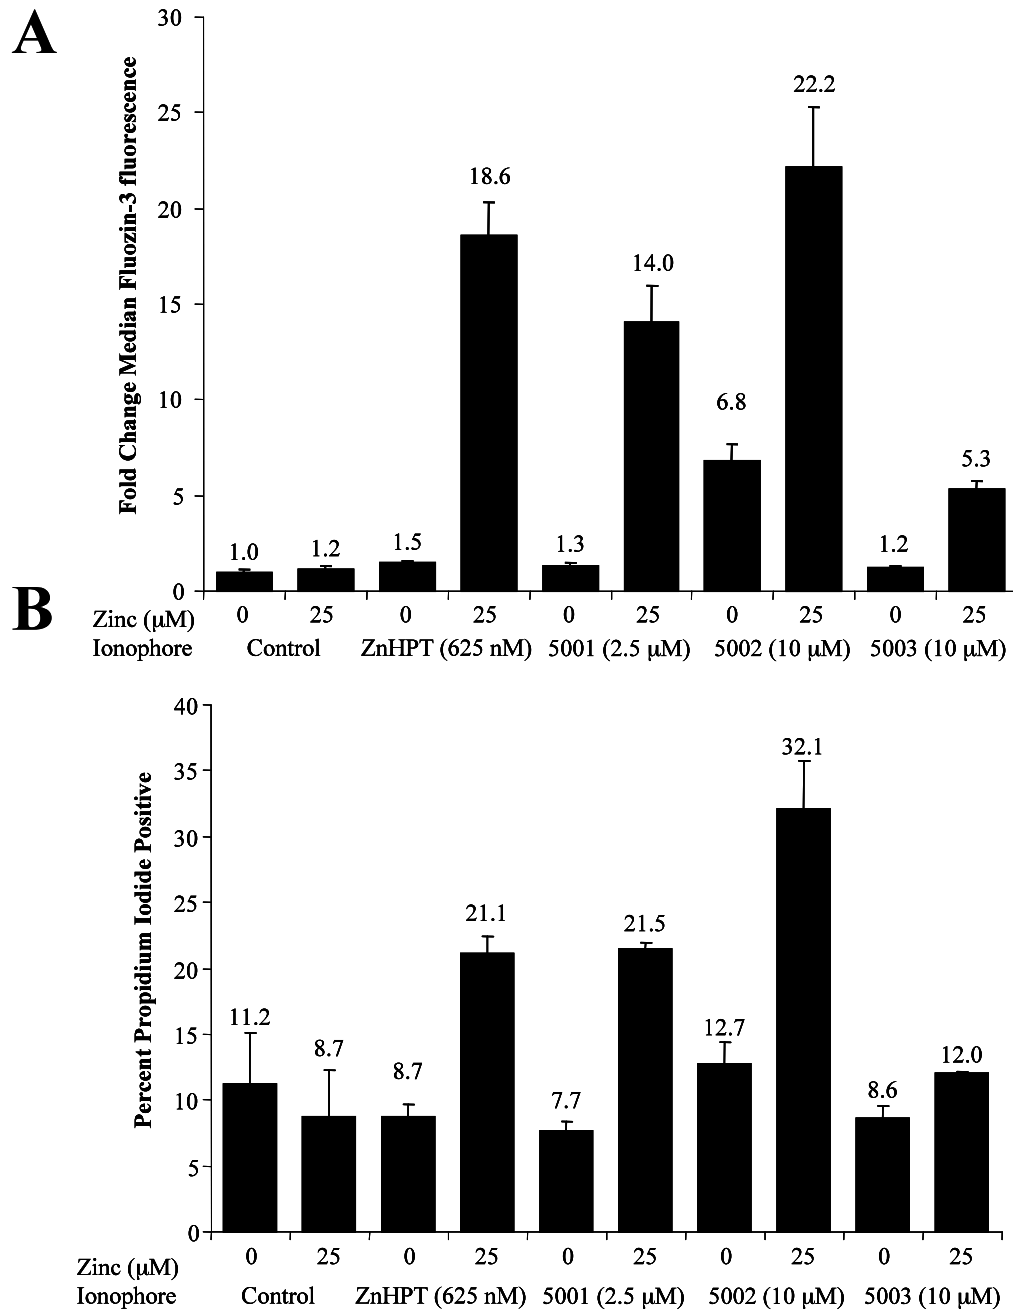

**Supplemental Figure 4. Zinc ionophore treatment alters levels of intracellular free zinc and leads to cell death of PC3 cells in response to zinc.** Plateau phase PC3 cultures were treated with zinc ionophores (0, 0.625, 2.5 or 10 μM) in the presence or absence of zinc acetate (Zinc, 25 μM) for 2 hours in duplicate experiments. Error bars indicate one standard deviation. A. Fold increase of FluoZin-3 fluorescence in live-gated cells after 2 hours. B. Percentage of propidium iodide stained cells after 2 hours.

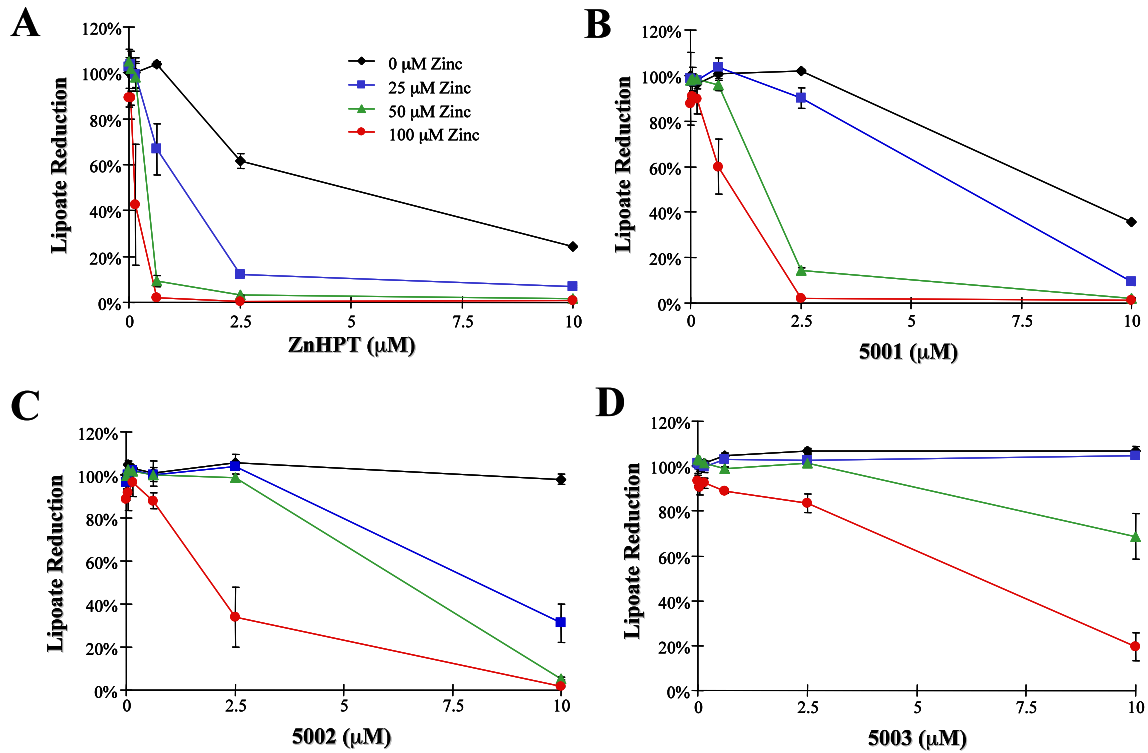

**Supplemental Figure 5. Inhibition of lipoate reduction in A549 cells.** Plateau phase A549 cultures were treated for 2 hours with zinc ionophore (0-10  $\mu\text{M}$ ) and zinc acetate [0  $\mu\text{M}$  (black line), 25  $\mu\text{M}$  (blue line), 50  $\mu\text{M}$  (green line), and 100  $\mu\text{M}$  (red line)], medium exchanged, and relative lipoate reduction measured after 20 minutes as described in Materials and Methods. Error bars indicate one standard deviation.



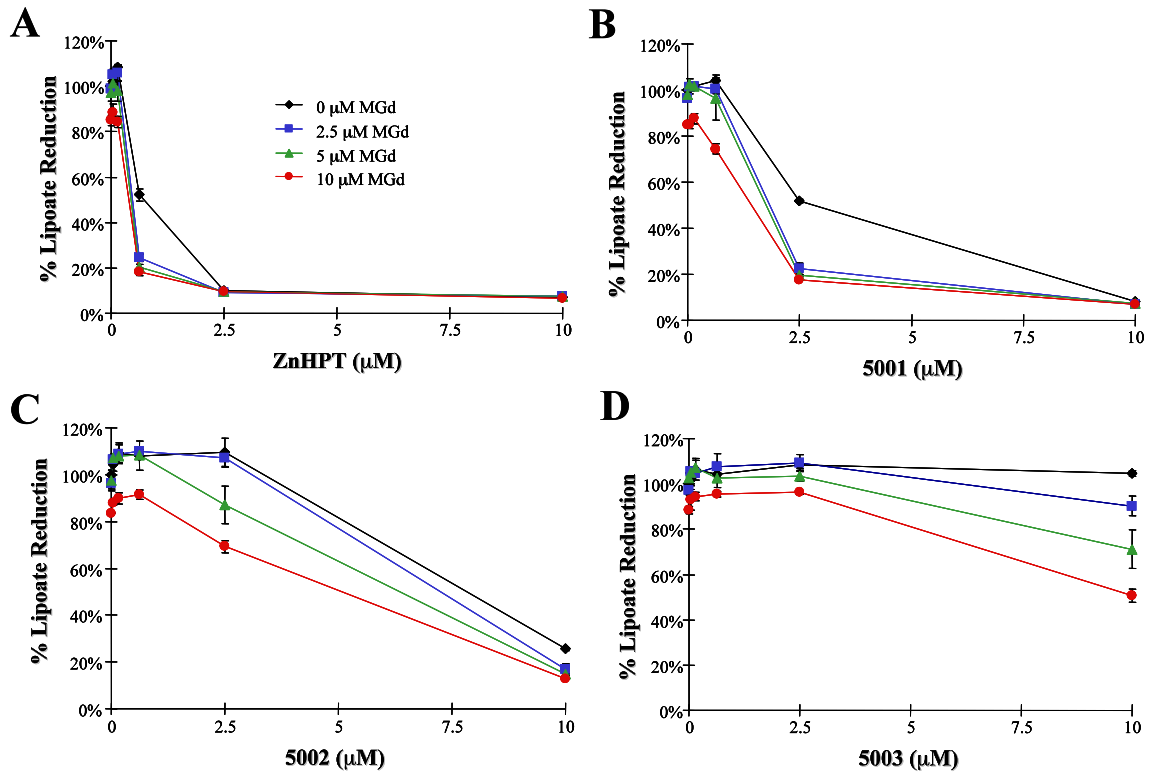

**Supplemental Figure 6. Inhibition of lipoate reduction in A549 cells.** Plateau phase A549 cultures were treated for 2 hours with zinc ionophore (0-10  $\mu\text{M}$ ) and motexafin gadolinium [0  $\mu\text{M}$  (black line), 2.5  $\mu\text{M}$  (blue line), 5  $\mu\text{M}$  (green line), and 10  $\mu\text{M}$  (red line)], medium exchanged, and relative lipoate reduction measured after 40 minutes as described in Materials and Methods. Error bars indicate one standard deviation.





**Supplemental Figure 9. Hierarchical clustering analysis of gene expression data from A549 cell cultures.** The dendrograms were generated based on average linkage hierarchical clustering of expression data from 538 transcripts whose coefficient of variation was greater than 0.10 across all in vitro groups. Data from untreated (mannitol), zinc treated (25  $\mu\text{M}$  zinc acetate), PCI-5002 treated (10  $\mu\text{M}$ ), and combination treated (zinc (25  $\mu\text{M}$ ) and PCI-2002 (10  $\mu\text{M}$ )) A459 cultures are provided in triplicate.

**Supplemental Figure 10. Hierarchical clustering analysis of gene expression data from A549 xenografts.** The dendrograms were generated based on average linkage hierarchical clustering of expression data from 100 transcripts whose coefficient of variation was greater than 0.10 across all groups. Data from control (untreated), PCI-5002 treated (100  $\mu\text{mol} / \text{kg}$ ), and PCI-5003 treated (100  $\mu\text{mol} / \text{kg}$ ) xenografts are provided in quadruplicate. The names of samples treated with PCI-5003 are coded in blue for clarity.

### **Synthesis of PCI-5001, PCI-5002, and PCI-5003**

**General.** All starting materials were purchased and used without further purification unless otherwise noted. Proton and  $^{13}\text{C}$  NMR spectra were recorded using a 250 MHz Varian, 300 MHz GE Tacmag spectrometer, 400 MHz Varian MERCURY or 500 MHz Varian INOVA. UV/Vis spectra were taken on Beckman DU-640B or Agilent 8453 Spectrophotometer. Column chromatography was run using ICN-Silitech 32-63 D60 Å silica gel or Sorbent Technologies standard activity 50-200  $\mu\text{m}$  neutral alumina. Sep-Pak reverse-phase tC18 cartridge columns were purchased from Waters.

### **Bromination of 2-Bromo-5-methyl-pyridine**

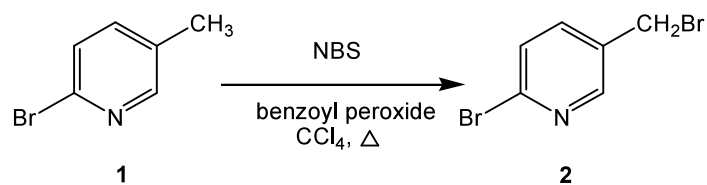

A solution of 2-bromo-5-methylpyridine (5g, 29.06mmol), N-bromosuccinimide (5.34g, 30mmol), benzoyl peroxide (60mg, 0.248mmol) in 40mL of dry CCl<sub>4</sub> was heated at reflux under N<sub>2</sub> for 8h. Large amount of solid was seen to float on the surface.

The hot mixture was filtered and the solid on the funnel was washed successively with two 10mL portions of hot CCl<sub>4</sub>. The solvent was removed using a rotary evaporator.

Purification on silica gel, using a gradient of hexane/ ethyl acetate as the eluent yielded 3.4g product (46%). The characterization data are identical to those reported in the literature. CI-MS: m/z 252 [M+H]<sup>+</sup>.

### PEGylation of 2-Bromo-5-bromomethylpyridine

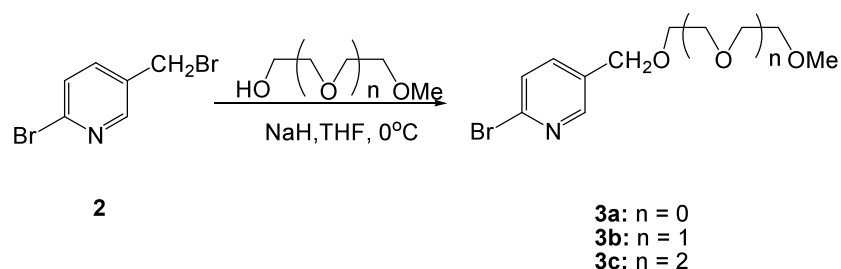

The PEGylation reactions with different length polyethylene glycols were carried out following the same procedure. An example is given below: To a stirred suspension of NaH (60% suspension in mineral oil, 640mg, 16mmol) in 100mL of anhydrous THF at 0°C was added diethyleneglycol methyl ether (0.95mL, 8mmol). The solution was allowed to stir at 0°C for 30min under N<sub>2</sub>. Then 2-Bromo-5-bromomethylpyridine (1.004g, 4mmol) in 5ml of THF was added dropwise to the solution. The resulting mixture was stirred at 0°C for another one hour. The mixture was concentrated under reduced pressure and 20 mL of CH<sub>2</sub>Cl<sub>2</sub> was added to dissolve the product. The inorganic salts were removed by vacuum filtration, and the filtrate was

concentrated on a rotary evaporator. Column chromatography on silica gel using CH<sub>2</sub>Cl<sub>2</sub> as the eluent yielded 1.1g PEGylation product **3b** (90%).

**2-Bromo-5-((2-methoxyethoxy)methyl)pyridine (3a)** Yield: 85%. ESI-MS:  $m/z$  246 [M+H]<sup>+</sup>; CI-HRMS [M+H]<sup>+</sup> calcd. for C<sub>9</sub>H<sub>13</sub>BrNO<sub>2</sub>: 246.0130 found: 246.0131. <sup>1</sup>H NMR (300 Hz, CDCl<sub>3</sub>): δ 8.27 (s, 1H), 7.52 (d,  $J$  = 8.2 Hz, 1H), 7.41 (d,  $J$  = 8.2 Hz, 1H), 4.49 (s, 2H), 3.60-3.58 (m, 2H), 3.53-3.51 (m, 2H), 3.33 (s, 3H) ppm. <sup>13</sup>C NMR (300 Hz, CDCl<sub>3</sub>): δ 149.1, 141.0, 137.9, 133.0, 127.7, 71.7, 69.8, 69.7, 58.9 ppm.

**2-Bromo-5-((2-(2-methoxyethoxy)ethoxy)methyl)pyridine (3b)** Yield: 90%. ESI-MS:  $m/z$  290 [M+H]<sup>+</sup>; CI-HRMS [M+H]<sup>+</sup> calcd. for C<sub>11</sub>H<sub>17</sub>BrNO<sub>3</sub>: 290.0392 found: 290.0389. <sup>1</sup>H NMR (300 Hz, CDCl<sub>3</sub>): δ 8.28 (s, 1H), 7.53 (d,  $J$  = 8.2 Hz, 1H), 7.41 (d,  $J$  = 8.2 Hz, 1H), 4.50 (s, 2H), 3.64-3.63 (m, 4H), 3.61-3.59 (m, 2H), 3.51-3.49 (m, 2H), 3.33 (s, 3H) ppm. <sup>13</sup>C NMR (300 Hz, CDCl<sub>3</sub>): δ 149.1, 141.0, 137.9, 133.0, 127.7, 71.7, 70.4(2), 70.4(1), 69.8, 69.7, 58.9 ppm.

**2-Bromo-5-((2-(2-(2-methoxyethoxy)ethoxy)ethoxy)methyl)pyridine (3c)** Yield: 88%. ESI-MS:  $m/z$  334 [M+H]<sup>+</sup>; CI-HRMS [M+H]<sup>+</sup> calcd. for C<sub>13</sub>H<sub>21</sub>BrNO<sub>4</sub>: 334.0654 found: 334.0656. <sup>1</sup>H NMR (300 Hz, CDCl<sub>3</sub>): δ 8.28 (s, 1H), 7.53 (d,  $J$  = 8.2 Hz, 1H), 7.42 (d,  $J$  = 8.2 Hz, 1H), 4.50 (s, 2H), 3.64-3.59 (m, 10H), 3.52-3.49 (m, 2H), 3.33 (s, 3H) ppm. <sup>13</sup>C NMR (300 Hz, CDCl<sub>3</sub>): δ 149.3, 141.2, 138.0, 133.2, 127.8, 71.9, 70.6, 70.5(4), 70.4(6), 69.9, 69.8 and 59.0 ppm.

## Oxidation of 2-Bromo-5-CH<sub>2</sub>OPEG-pyridine

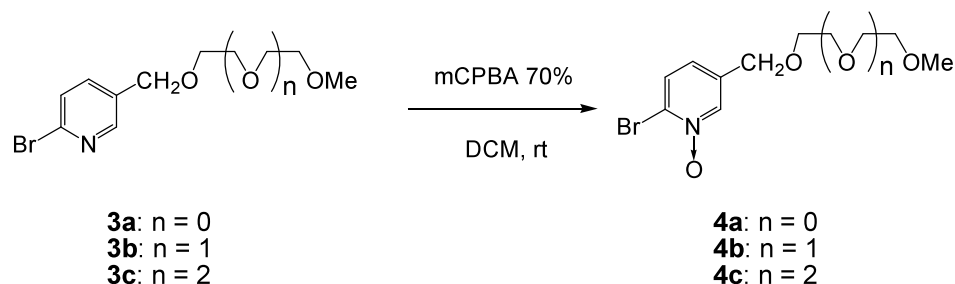

The oxidation reactions of **3a-c** were carried out following the same procedure. An example is given below: To a solution of 2-Bromo-5-CH<sub>2</sub>PEG(2)-pyridine (**3b**, 1.1g, 3.79mmol) in 15mL of CH<sub>2</sub>Cl<sub>2</sub> was added 3-chloroperoxybenzoic acid (1.7g, 7.58mmol). After being stirred at room temperature overnight, the reaction mixture was concentrated under reduced pressure. De-ionized water (DI H<sub>2</sub>O, 10 mL) was added to dissolve the product. The insoluble solid was removed by vacuum filtration and the solid on the funnel was washed with DI H<sub>2</sub>O (5mL x 2). The combined filtrate and washings were loaded on a tC-18 Sep-pak column and purified to provide 950mg (82%) of **4b**.

**2-Bromo-5-((2-methoxyethoxy)methyl)pyridine-N-oxide (4a, PCI-5501)** Yield: 76%. ESI-MS: *m/z* 262 [M+H]<sup>+</sup>. <sup>1</sup>H NMR (300 Hz, CDCl<sub>3</sub>): δ 8.35 (s, 1H), 7.56 (d, *J* = 8.2 Hz, 1H), 7.04 (d, *J* = 8.2 Hz, 1H), 4.46 (s, 2H), 3.62-3.60 (m, 2H), 3.54-3.51 (m, 2H), 3.33 (s, 3H) ppm. <sup>13</sup>C NMR (300 Hz, CDCl<sub>3</sub>): δ 139.1, 136.6, 131.1, 130.0, 124.6, 71.5, 69.9, 68.8, 58.8 ppm.

**2-Bromo-5-((2-(2-methoxyethoxy)ethoxy)methyl)pyridine-N-oxide (4b, PCI-5502)** Yield: 78%. ESI-MS: *m/z* 306 [M+H]<sup>+</sup>; CI-HRMS [M+H]<sup>+</sup> calcd. for C<sub>11</sub>H<sub>17</sub> BrNO<sub>4</sub>: 306.0341 found: 306.0328. <sup>1</sup>H NMR (300 Hz, CDCl<sub>3</sub>): δ 8.29 (s, 1H), 7.51 (d, *J* = 8.8 Hz, 1H), 6.99 (d, *J* = 8.8 Hz, 1H), 4.41 (s, 2H), 3.57-3.56 (m, 4H), 3.54-3.52 (m, 2H), 3.45-3.43 (m, 2H), 3.26 (s, 3H) ppm. <sup>13</sup>C NMR (300 Hz, CDCl<sub>3</sub>): δ 138.8, 136.7, 131.2, 130.0, 124.8, 71.6, 70.3, 70.2(7), 70.0, 68.8, 58.8 ppm.

**2-Bromo-5-((2-(2-(2-methoxyethoxy)ethoxy)ethoxy)methyl)pyridine-N-oxide (4c, PCI-5503)**

Yield: 70%. ESI-MS:  $m/z$  350  $[M+H]^+$ .  $^1H$  NMR (300 Hz,  $CDCl_3$ ):  $\delta$  8.33 (s, 1H), 7.55 (d,  $J=8.8$  Hz, 1H), 7.04 (d,  $J=8.8$  Hz, 1H), 4.45 (s, 2H), 3.62-3.56 (m, 10H), 3.49-3.40 (m, 2H), 3.30 (s, 3H) ppm.  $^{13}C$  NMR (300 Hz,  $CDCl_3$ ):  $\delta$  139.8, 136.8, 131.2, 130.2, 124.7, 71.8, 70.4(4) broad, 70.4, 70.1, 68.9, 58.9 ppm.

**Sodium sulfide reaction with 2-Bromo-5-CH<sub>2</sub>PEG-pyridine-N-Oxide**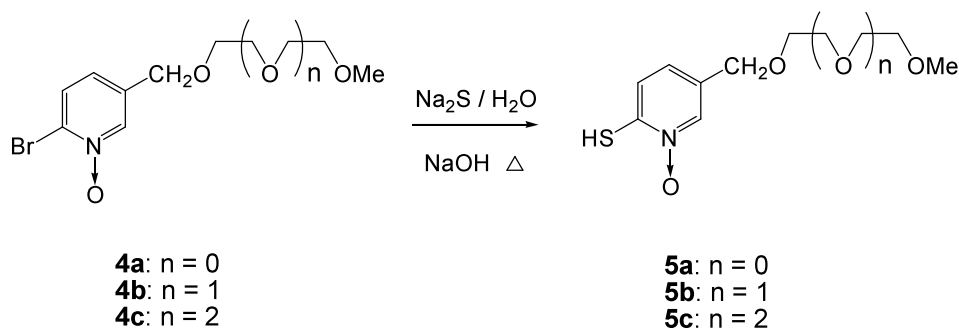

The reactions of **4a-c** with sodium sulfide were carried out following the same procedure. An example is given below: A 50mL three-neck round-bottom flask equipped with a reflux condenser was charged with **4b** (950mg, 3.1mmol), 0.1N NaOH solution (0.3 mL) and 5mL of DI H<sub>2</sub>O. The resulting solution was heated to 80°C. Na<sub>2</sub>S (484 mg, 6.2 mmol) in 2mL of DI H<sub>2</sub>O was added dropwise via a syringe over a period of 1h. The reaction mixture was allowed to stir for an additional 1 h. After cooling to room temperature, acetic acid was added to adjust pH to 5. The mixture was concentrated under vacuum to give **5b** as yellow oil, which was used in the next reaction without further purification. Small amounts of analytical samples were prepared by silica gel column chromatography followed by Sep-Pak treatment.

**2-Mercapto-5-((2-methoxyethoxy)methyl)pyridine-N-oxide (5a). ESI-MS:  $m/z$  216  $[M+H]^+$ .**

$^1H$  NMR (300 Hz,  $CDCl_3$ ):  $\delta$  8.10 (s, 1H), 7.60 (d,  $J=8.4$  Hz, 1H), 7.21 (d,  $J=8.4$  Hz, 1H), 4.44 (s, 2H), 3.65-3.62 (m, 2H), 3.57-3.53 (m, 2H), 3.36 (s, 3H) ppm.  $^{13}C$  NMR (300 Hz,  $CDCl_3$ ):  $\delta$  165.6, 132.1, 131.5, 129.9, 125.7, 71.7, 69.9, 68.9, 60.0 ppm.



**2-Mercapto-5-((2-(2-methoxyethoxy)ethoxy)methyl)pyridine-N-oxide (5b)** ESI-MS:  $m/z$  260  $[M+H]^+$ ;  $^1H$  NMR (300 Hz,  $CDCl_3$ ):  $\delta$  8.12 (s, 1H), 7.58 (d,  $J = 8.4$  Hz, 1H), 7.19 (d,  $J = 8.4$  Hz, 1H), 4.53 (s, 2H), 3.66-3.65 (m, 4H), 3.62-3.60 (m, 2H), 3.54-3.51 (m, 2H), 3.35 (s, 3H) ppm.  $^{13}C$  NMR (300 Hz,  $CDCl_3$ ):  $\delta$  165.7, 132.1, 131.5, 130.0, 125.9, 71.8, 70.5, 69.9, 68.9, 59.0 ppm.

**2-Mercapto-5-((2-(2-(2-methoxyethoxy)ethoxy)ethoxy)methyl)pyridine-N-oxide (5c)** ESI-MS:  $m/z$  304  $[M+H]^+$ .  $^1H$  NMR (300 Hz,  $CDCl_3$ ):  $\delta$  8.12 (s, 1H), 7.57 (d,  $J = 8.4$  Hz, 1H), 7.18 (d,  $J = 8.4$  Hz, 1H), 4.43 (s, 2H), 3.63-3.59 (m, 10H), 3.50-3.48 (m, 2H), 3.31 (s, 3H) ppm.  $^{13}C$  NMR (300 Hz,  $CDCl_3$ ):  $\delta$  165.7, 132.1, 131.4, 130.0, 125.9, 71.8, 70.6, 70.5, 70.4, 68.9 and 59.0 ppm.

### Preparation of zinc complex of 2-mercapto-5-CH<sub>2</sub>PEG-pyridine-N-Oxide---General Procedure

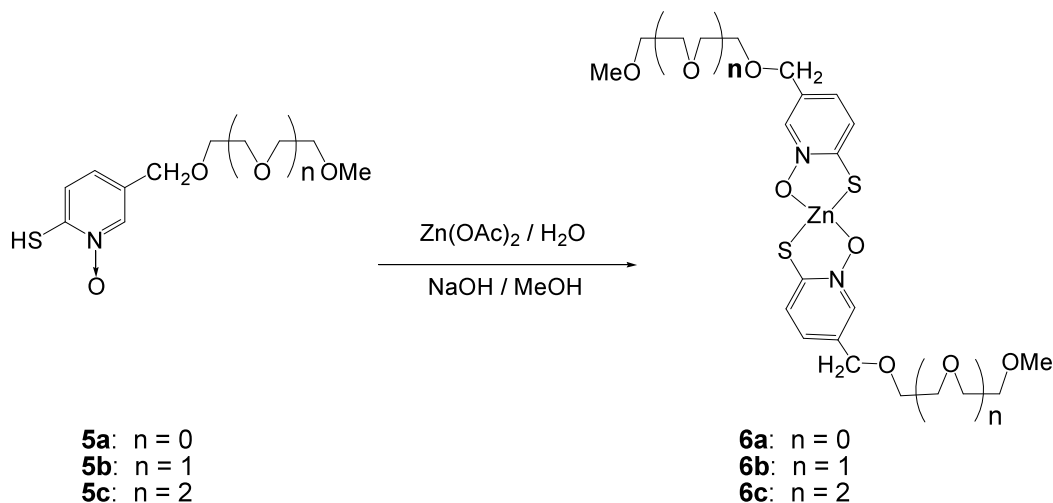

To a solution of crude **5b** from the previous step, 5 mL of MeOH and 1 mL of DI H<sub>2</sub>O, 1N NaOH solution was added to adjust pH to 8 at room temperature. Then 1 equivalent of Zn(OAc)<sub>2</sub> was added and the resulting mixture was heated to 70°C and stirred under N<sub>2</sub> atmosphere for 1h. The reaction mixture was concentrated under reduced pressure. The residue was purified by Sep-pak chromatography to give **6b** (630mg, yield for 2 steps combined: 70%) as a light brown solid.

**2-Mercapto-5-((2-methoxyethoxy)methyl)pyridine-N-oxide, Zn complex (6a, PCI-5001)**

Yield: 65% (for 2 steps). ESI-MS:  $m/z$  493  $[M+H]^+$ . CI-HRMS  $[M+H]^+$  calcd. for  $C_{18}H_{25}N_2O_6S_2Zn$ : 493.0446 found: 493.0440.  $^1H$  NMR (300 Hz,  $CDCl_3$ ):  $\delta$  8.26 (d,  $J = 2.0$  Hz, 2H), 7.62 (d,  $J = 8.4$  Hz, 2H), 7.18 (dd,  $J = 8.4$ ,  $J = 2.0$  Hz, 2H), 4.43 (s, 4H), 3.57-3.55 (m, 4H), 3.51-3.49 (m, 4H), 3.32 (s, 6H) ppm.  $^{13}C$  NMR (300 Hz,  $CDCl_3$ ):  $\delta$  158.1, 136.0, 129.6, 129.5, 129.2, 71.7, 69.7, 69.1 and 59.0 ppm.

**2-Mercapto-5-((2-(2-methoxyethoxy)ethoxy)methyl)pyridine-N-oxide, Zn complex (6b, PCI-5002)**

Yield: 70% (for 2 steps). ESI-MS:  $m/z$  581  $[M+H]^+$ ; FAB-HRMS  $[M+H]^+$  calcd. for  $C_{22}H_{33}N_2O_8S_2Zn$ : 581.0967; found: 581.0958.  $^1H$  NMR (300 Hz,  $CDCl_3$ ):  $\delta$  8.29 (d,  $J = 2.0$  Hz, 2H), 7.65 (d,  $J = 8.4$  Hz, 2H), 7.20 (dd,  $J = 8.4$ ,  $J = 2.0$  Hz, 2H), 4.46 (s, 4H), 3.63-3.60 (m, 12H), 3.53-3.51 (m, 4H), 3.35 (s, 6H) ppm.  $^{13}C$  NMR (300 Hz,  $CDCl_3$ ):  $\delta$  158.2, 136.1, 129.8, 129.6, 129.3, 71.9, 70.6, 70.5, 69.9, 69.2 and 59.0 ppm.

**2-Mercapto-5-((2-(2-(2-methoxyethoxy)ethoxy)ethoxy)methyl)pyridine-N-oxide, Zn complex (6c, PCI-5003)**

Yield: 61% (for 2 steps). CI-MS:  $m/z$  669  $[M+H]^+$ . FAB-HRMS  $[M+H]^+$  calcd. for  $C_{26}H_{41}N_2O_{10}S_2Zn$ : 669.1494; found: 669.1488.  $^1H$  NMR (300 Hz,  $CDCl_3$ ):  $\delta$  8.29 (d,  $J = 2.0$  Hz, 2H), 7.66 (d,  $J = 8.4$  Hz, 2H), 7.21 (dd,  $J = 8.4$ , 2.0 Hz, 2H), 4.46 (s, 4H), 3.65-3.59 (m, 20H), 3.53-3.50 (m, 4H), 3.34 (s, 6H) ppm.  $^{13}C$  NMR (300 Hz,  $CDCl_3$ ):  $\delta$  158.2, 136.1, 129.8, 129.7, 129.3, 71.8, 71.9, 70.7, 70.6, 70.5, 69.9, 69.2 ppm.

Supplemental Data Table 1. Bond lengths [Å] and angles [°] for PCI-5001.

---

|             |            |             |           |
|-------------|------------|-------------|-----------|
| Zn1-O1      | 2.0516(11) | C5-H5       | 0.896(19) |
| Zn1-O4#1    | 2.1065(11) | C6-H6A      | 0.99(2)   |
| Zn1-O4      | 2.1656(10) | C6-H6B      | 0.96(2)   |
| Zn1-S1      | 2.3106(4)  | C7-C8       | 1.491(3)  |
| Zn1-S2      | 2.3203(4)  | C7-H7A      | 0.98(2)   |
| S1-C1       | 1.7220(16) | C7-H7B      | 0.98(2)   |
| S2-C10      | 1.7202(16) | C8-H8A      | 0.99(2)   |
| O1-N1       | 1.3441(16) | C8-H8B      | 0.98(2)   |
| O2-C6       | 1.409(2)   | C9-H9A      | 0.95(2)   |
| O2-C7       | 1.428(2)   | C9-H9B      | 1.01(3)   |
| O3-C8       | 1.414(2)   | C9-H9C      | 0.97(2)   |
| O3-C9       | 1.418(2)   | C10-C11     | 1.410(2)  |
| O4-N2       | 1.3567(15) | C11-C12     | 1.376(2)  |
| O4-Zn1#1    | 2.1065(11) | C11-H11     | 0.943(18) |
| O5-C15      | 1.418(2)   | C12-C13     | 1.398(2)  |
| O5-C16      | 1.419(2)   | C12-H12     | 0.942(19) |
| O6-C18      | 1.416(2)   | C13-C14     | 1.373(2)  |
| O6-C17      | 1.418(2)   | C13-C15     | 1.507(2)  |
| N1-C5       | 1.361(2)   | C14-H14     | 0.927(18) |
| N1-C1       | 1.368(2)   | C15-H15A    | 1.01(2)   |
| N2-C14      | 1.351(2)   | C15-H15B    | 1.01(2)   |
| N2-C10      | 1.3668(19) | C16-C17     | 1.498(3)  |
| C1-C2       | 1.406(2)   | C16-H16A    | 0.97(2)   |
| C2-C3       | 1.365(2)   | C16-H16B    | 0.98(2)   |
| C2-H2       | 0.969(19)  | C17-H17A    | 0.99(2)   |
| C3-C4       | 1.399(2)   | C17-H17B    | 0.98(2)   |
| C3-H3       | 0.94(2)    | C18-H18A    | 0.97(3)   |
| C4-C5       | 1.374(2)   | C18-H18B    | 0.94(2)   |
| C4-C6       | 1.502(2)   | C18-H18C    | 1.01(2)   |
| O1-Zn1-O4#1 | 97.49(4)   | O4#1-Zn1-O4 | 79.64(4)  |
| O1-Zn1-O4   | 176.76(4)  | O1-Zn1-S1   | 85.70(3)  |

|              |             |             |            |
|--------------|-------------|-------------|------------|
| O4#1-Zn1-S1  | 106.37(3)   | C4-C5-H5    | 123.5(12)  |
| O4-Zn1-S1    | 93.64(3)    | O2-C6-C4    | 111.54(13) |
| O1-Zn1-S2    | 99.89(3)    | O2-C6-H6A   | 109.2(12)  |
| O4#1-Zn1-S2  | 109.63(3)   | C4-C6-H6A   | 109.1(12)  |
| O4-Zn1-S2    | 82.56(3)    | O2-C6-H6B   | 112.3(12)  |
| S1-Zn1-S2    | 142.391(17) | C4-C6-H6B   | 106.2(12)  |
| C1-S1-Zn1    | 95.94(5)    | H6A-C6-H6B  | 108.5(16)  |
| C10-S2-Zn1   | 98.52(5)    | O2-C7-C8    | 110.44(15) |
| N1-O1-Zn1    | 115.88(9)   | O2-C7-H7A   | 105.1(12)  |
| C6-O2-C7     | 110.08(13)  | C8-C7-H7A   | 111.9(13)  |
| C8-O3-C9     | 112.48(14)  | O2-C7-H7B   | 109.2(13)  |
| N2-O4-Zn1#1  | 114.93(8)   | C8-C7-H7B   | 110.0(13)  |
| N2-O4-Zn1    | 115.44(8)   | H7A-C7-H7B  | 110.0(18)  |
| Zn1#1-O4-Zn1 | 100.36(4)   | O3-C8-C7    | 109.53(15) |
| C15-O5-C16   | 113.76(13)  | O3-C8-H8A   | 109.3(12)  |
| C18-O6-C17   | 112.26(16)  | C7-C8-H8A   | 112.3(12)  |
| O1-N1-C5     | 116.56(13)  | O3-C8-H8B   | 110.0(13)  |
| O1-N1-C1     | 121.01(12)  | C7-C8-H8B   | 109.5(13)  |
| C5-N1-C1     | 122.43(13)  | H8A-C8-H8B  | 106.1(17)  |
| C14-N2-O4    | 116.46(12)  | O3-C9-H9A   | 107.7(14)  |
| C14-N2-C10   | 123.39(13)  | O3-C9-H9B   | 109.6(14)  |
| O4-N2-C10    | 120.15(12)  | H9A-C9-H9B  | 107.6(19)  |
| N1-C1-C2     | 116.34(14)  | O3-C9-H9C   | 110.4(14)  |
| N1-C1-S1     | 121.32(11)  | H9A-C9-H9C  | 108.4(19)  |
| C2-C1-S1     | 122.33(12)  | H9B-C9-H9C  | 112.9(19)  |
| C3-C2-C1     | 121.77(16)  | N2-C10-C11  | 115.64(14) |
| C3-C2-H2     | 120.7(11)   | N2-C10-S2   | 121.51(11) |
| C1-C2-H2     | 117.5(11)   | C11-C10-S2  | 122.84(12) |
| C2-C3-C4     | 120.41(15)  | C12-C11-C10 | 121.82(15) |
| C2-C3-H3     | 119.6(12)   | C12-C11-H11 | 120.7(11)  |
| C4-C3-H3     | 120.0(12)   | C10-C11-H11 | 117.5(11)  |
| C5-C4-C3     | 117.49(15)  | C11-C12-C13 | 120.09(14) |
| C5-C4-C6     | 122.87(15)  | C11-C12-H12 | 119.2(11)  |
| C3-C4-C6     | 119.64(14)  | C13-C12-H12 | 120.7(11)  |
| N1-C5-C4     | 121.54(15)  | C14-C13-C12 | 117.59(15) |
| N1-C5-H5     | 114.9(12)   | C14-C13-C15 | 118.63(14) |

|               |            |
|---------------|------------|
| C12-C13-C15   | 123.76(14) |
| N2-C14-C13    | 121.45(15) |
| N2-C14-H14    | 116.7(11)  |
| C13-C14-H14   | 121.9(11)  |
| O5-C15-C13    | 107.89(13) |
| O5-C15-H15A   | 112.3(12)  |
| C13-C15-H15A  | 110.1(12)  |
| O5-C15-H15B   | 108.6(11)  |
| C13-C15-H15B  | 109.3(11)  |
| H15A-C15-H15B | 108.7(15)  |
| O5-C16-C17    | 108.33(15) |
| O5-C16-H16A   | 110.1(12)  |
| C17-C16-H16A  | 109.9(12)  |
| O5-C16-H16B   | 110.4(12)  |
| C17-C16-H16B  | 109.8(12)  |
| H16A-C16-H16B | 108.2(17)  |
| O6-C17-C16    | 109.86(15) |
| O6-C17-H17A   | 109.3(14)  |
| C16-C17-H17A  | 110.1(13)  |
| O6-C17-H17B   | 108.5(12)  |
| C16-C17-H17B  | 110.4(12)  |
| H17A-C17-H17B | 108.6(18)  |
| O6-C18-H18A   | 108.4(15)  |
| O6-C18-H18B   | 111.5(15)  |
| H18A-C18-H18B | 109(2)     |
| O6-C18-H18C   | 108.5(14)  |
| H18A-C18-H18C | 113(2)     |
| H18B-C18-H18C | 107(2)     |

---

Symmetry transformations used to generate equivalent atoms:  
#1 -x+1,-y+1,-z+1

## Reference List

- (1) Mosmann T. Rapid colorimetric assay for cellular growth and survival: application to proliferation and cytotoxicity assays. *J Immunol Methods* 1983 Dec 16;65(1-2):55-63.
- (2) Biaglow JE, Donahue J, Tuttle S, Held K, Chrestensen C, Mieyal J. A method for measuring disulfide reduction by cultured mammalian cells: relative contributions of glutathione-dependent and glutathione-independent mechanisms. *Anal Biochem* 2000 May 15;281(1):77-86.
- (3) Gee KR, Zhou ZL, Ton-That D, Sensi SL, Weiss JH. Measuring zinc in living cells. A new generation of sensitive and selective fluorescent probes. *Cell Calcium* 2002;31(5):245-51.
- (4) Magda D, Lecane P, Miller RA, Lepp C, Miles D, Mesfin M, et al. Motexafin gadolinium disrupts zinc metabolism in human cancer cell lines. *Cancer Res* 2005 May 1;65(9):3837-45.
- (5) Lecane PS, Karaman MW, Sirisawad M, Naumovski L, Miller RA, Hacia JG, et al. Motexafin gadolinium and zinc induce oxidative stress responses and apoptosis in B-cell lymphoma lines. *Cancer Res* 2005 Dec 15;65(24):11676-88.
- (6) Sirotnak FM, Zakowski MF, Miller VA, Scher HI, Kris MG. Efficacy of cytotoxic agents against human tumor xenografts is markedly enhanced by coadministration of ZD1839 (Iressa), an inhibitor of EGFR tyrosine kinase. *Clin Cancer Res* 2000 Dec;6(12):4885-92.
